# Supplementary material for: Unravelling the promoting effect of the ultrathin TaC/RGO nanosheet hybrid for enhanced catalytic activity of Pd nanoparticles
Source: Royal Society of Chemistry journal article supplement (doi:10.1039/c6cy01043a), 2016-01-01
Supplement: c6cy01043a1.pdf [file c6cy01043a1.pdf]

## Supporting Information

### **Unravelling the promoting effect of ultrathin TaC/RGO nanosheets hybrid for enhanced catalytic activity of Pd nanoparticles**

***Chunyong He<sup>\*a,b</sup>, Juzhou Tao<sup>\*a,b</sup>, Guoqiang He<sup>c</sup> Pei Kang Shen<sup>\*,c</sup> Yongfu Qiu<sup>d</sup>***

Dr. C. He, Prof. J. Tao, Prof. G. He, Prof. P. K. Shen

*<sup>a</sup> Institute of High Energy Physics, Chinese Academy of Sciences (CAS), Beijing 100049, China*

*<sup>b</sup> Dongguan Neutron Science Center, Dongguan 523803, China*

*<sup>c</sup> Collaborative Innovation Center of Sustainable Energy Materials, Guangxi University, Nanning, Guangxi, 530004, PR China*

*<sup>d</sup> College of Chemistry and Environmental Engineering, Dongguan University of Technology, Guangdong 523808, P. R. China*

E-mail: taoj@ihep.ac.cn (J. Tao); hechunyong@ihep.ac.cn (C. He); pkshen@gxu.edu.cn (P.K. Shen)

**Keywords:** Two-Dimensional, Transition Metal Carbides, Pd nanoparticles, Methanol oxidation reaction, Direct methanol fuel cells

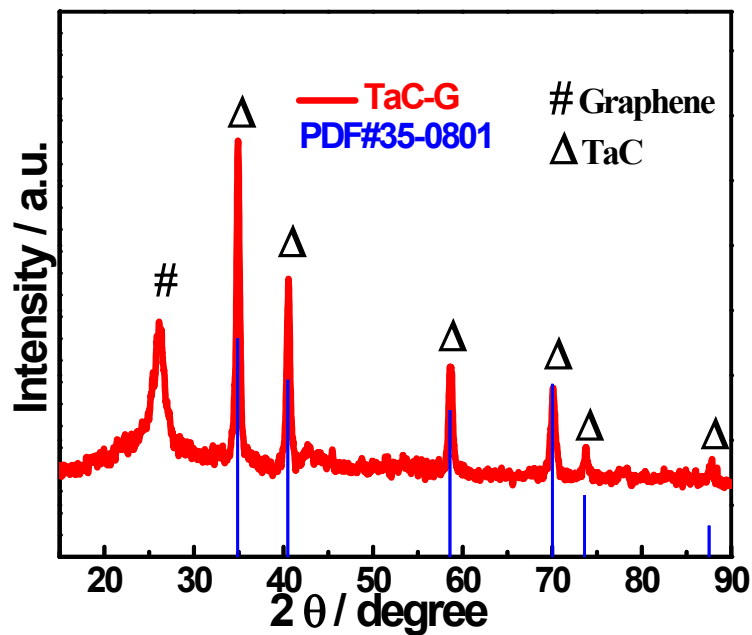

**Fig. S1** The XRD pattern of TaC-G. The diffraction peak at  $2\theta = 26.2^\circ$  is the characteristic of the graphite (002) plane, demonstrating the reduce of the GO after annealing. The distinct diffraction peaks at  $2\theta = 34.94^\circ, 40.58^\circ, 58.74^\circ, 70.12^\circ, 73.76^\circ$  and  $87.86^\circ$  are indexed as the (111), (200), (220), (311), (220), (400) planes of TaC (Cubic, Fm-3m(225)). The blue vertical lines indicate the peaks of the cubic TaC reflections (PDF#35-0801)

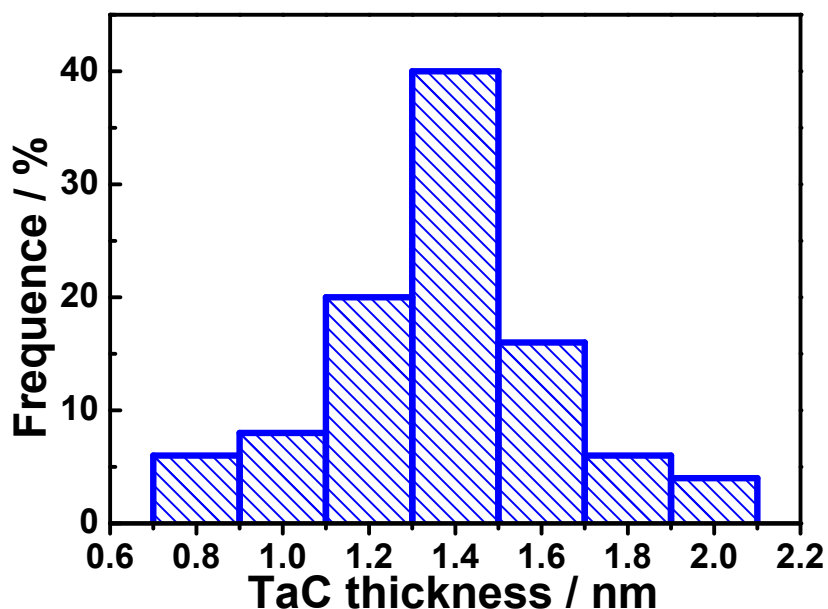

**Fig. S2** The thickness distribution histograms of the ultrathin TaC nanosheets.

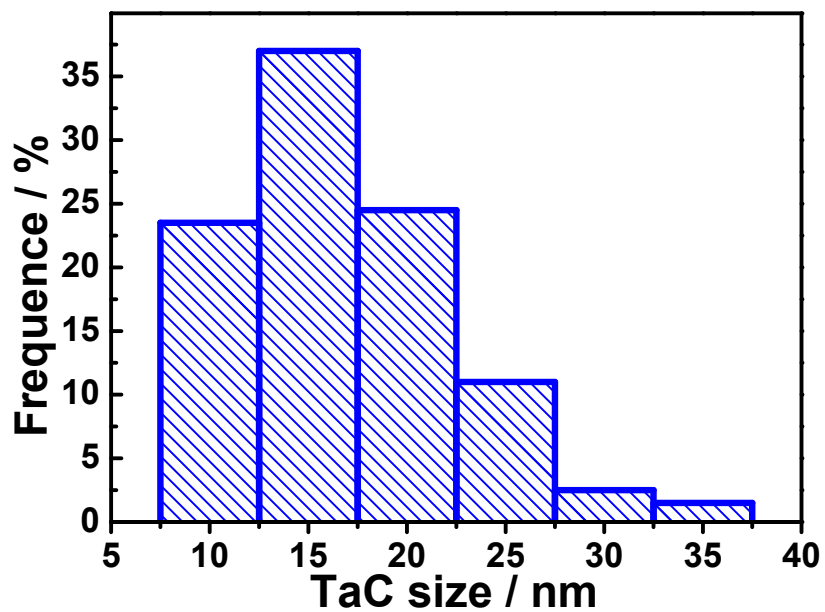

**Fig. S3** Size distribution histograms of the ultrathin TaC nanosheets.

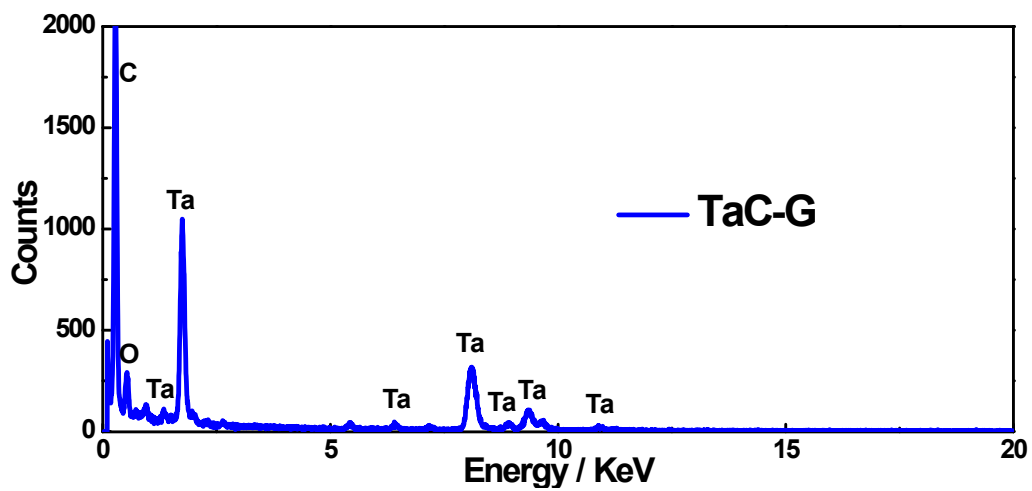

**Fig. S4** The EDS pattern of TaC-G, showing the coexist of carbon, oxygen and tantalum elements.

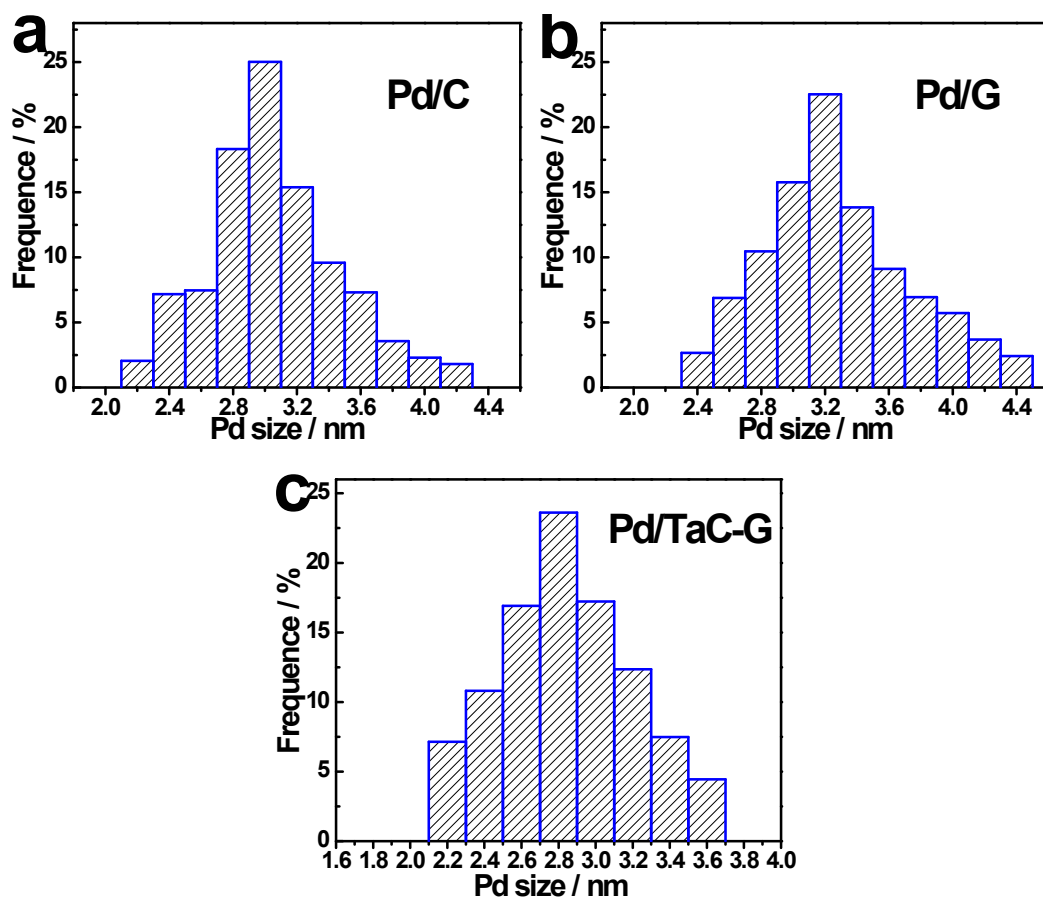

**Fig. S5** Size-distribution histograms of the Pd/C (a), Pd/G (b) and Pd/TaC-G (c).

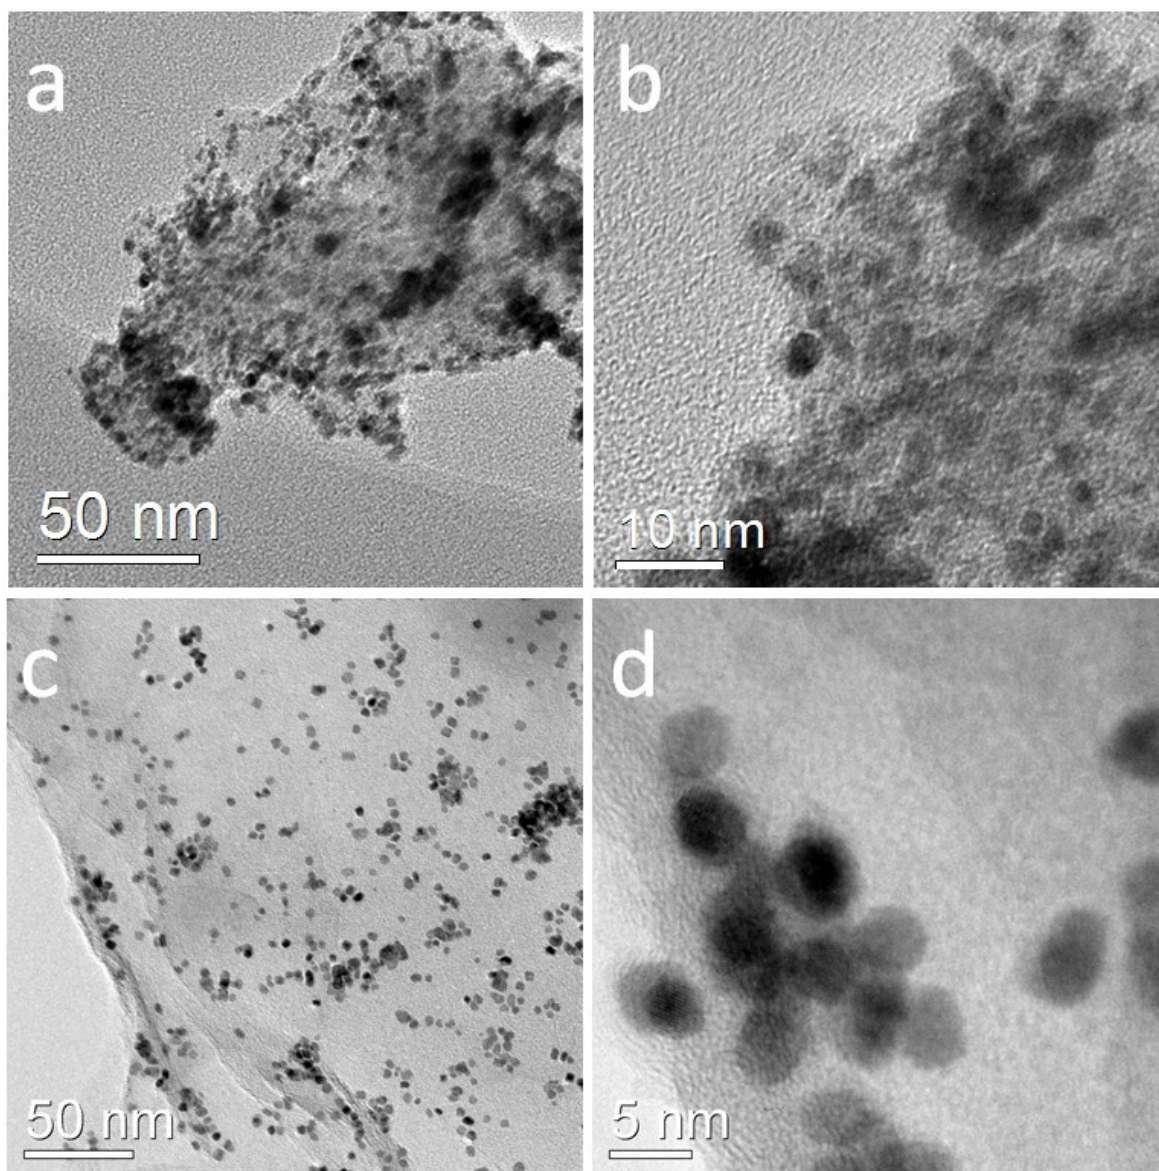

**Fig. S6** (a,b) TEM images of Pd/C, (c,d) TEM images of Pd/G,

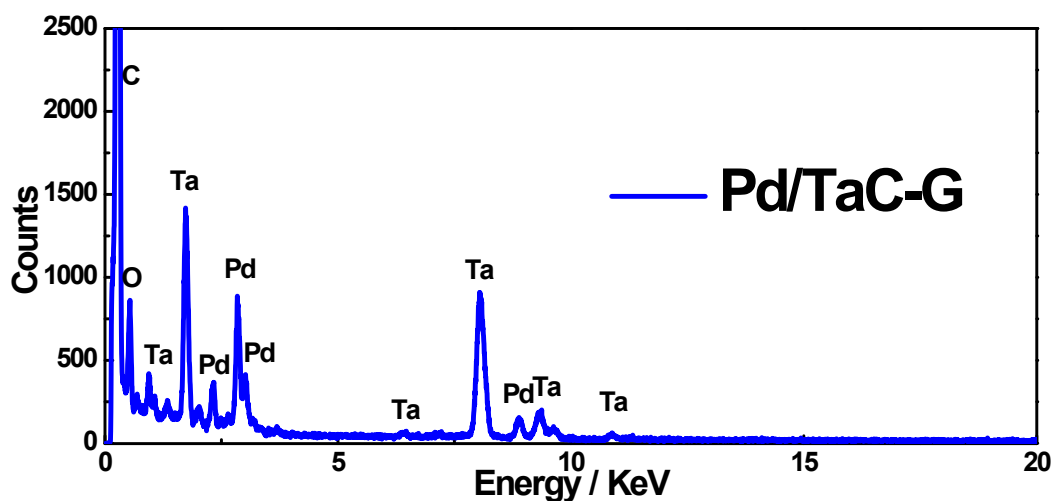

**Fig. S7** The EDS pattern of Pd/TaC-G, showing the coexist of carbon, oxygen, tantalum and palladium elements.

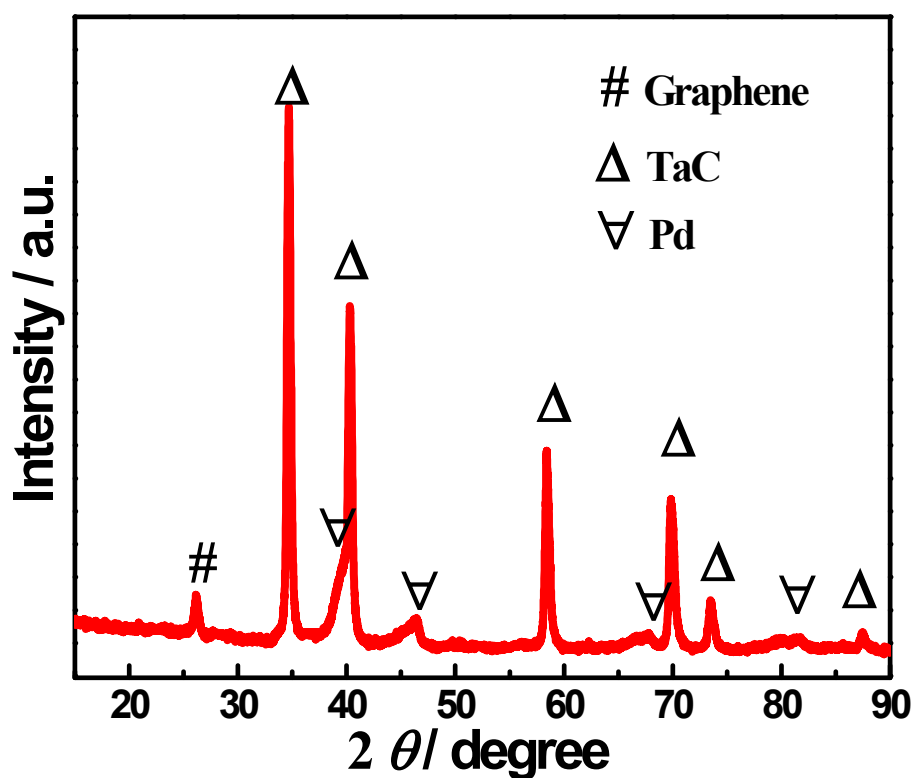

**Fig. S8** The XRD pattern of Pd/TaC-G, showing the Pd and TaC phases unambiguously. The peaks at  $2\theta$  of  $40.06^\circ$ ,  $46.23^\circ$ ,  $67.83^\circ$  and  $81.67^\circ$  correspond to the (111), (200), (220) and (311) facets of Pd, showing a typical face-centered cubic (fcc) structure.

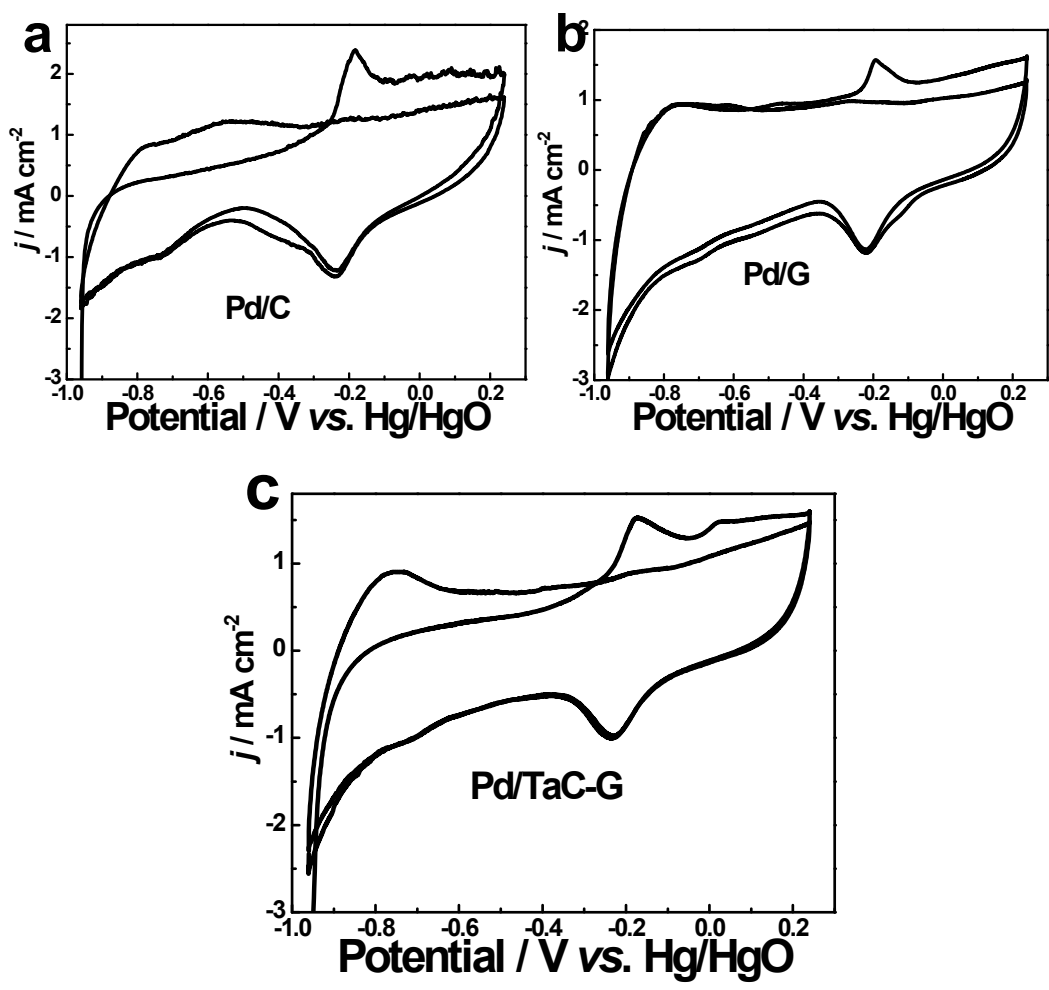

**Fig. S9** CO-stripping of Pd/C, Pd/TaC-G and Pd/TaC-G in 1.0 mol L<sup>-1</sup> KOH solution of Pd/C (a), Pd/G (b) and Pd/TaC-G (c).

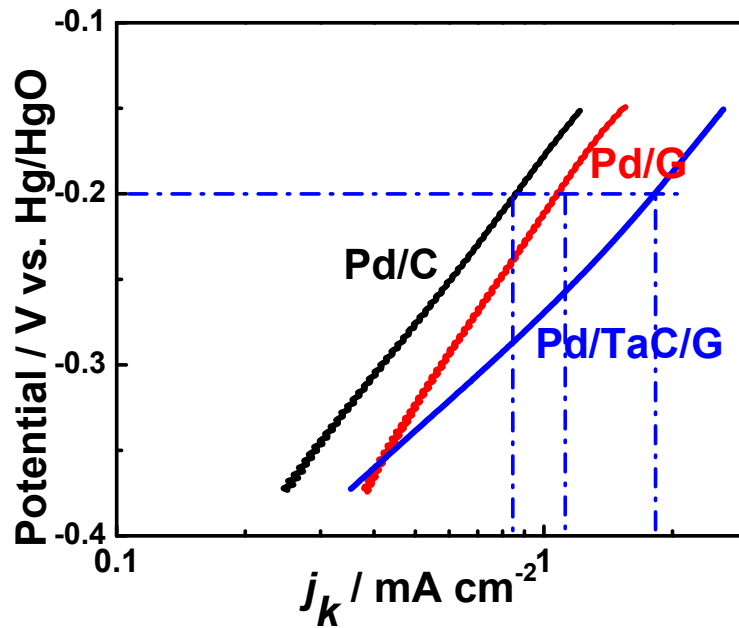

**Fig. S10** shows the comparison of specific activities ( $j_k$ , calculated from normalizing the electrode current to the ECSA that obtained from the CO stripping) of Pd/C, Pd/G and Pd/TaC-G. The Pd/TaC-G ( $1.81 \text{ mA cm}^{-2}$ ) exhibits about 2.1-fold and 1.7-fold enhancement in specific activity compared to that of Pd/C ( $0.85 \text{ mA cm}^{-2}$ ) and Pd/G ( $1.08 \text{ mA cm}^{-2}$ ) at  $-0.2 \text{ V}$  (vs. Hg/HgO), respectively.



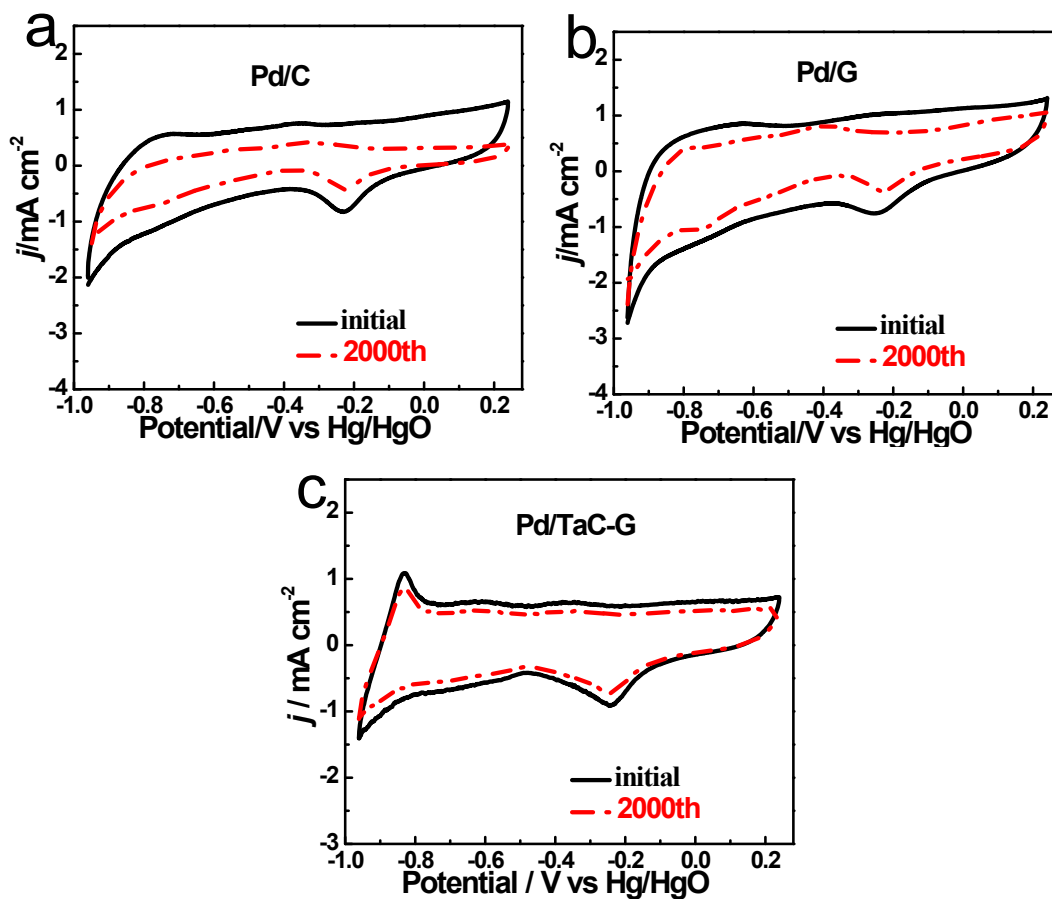

**Fig. S11** CVs of Pd/C (a), Pd/G (b) and Pd/TaC-G (c) catalysts before and after the continuous cycling test in  $\text{N}_2$ -saturated in  $1.0 \text{ mol L}^{-1}$  KOH solution.

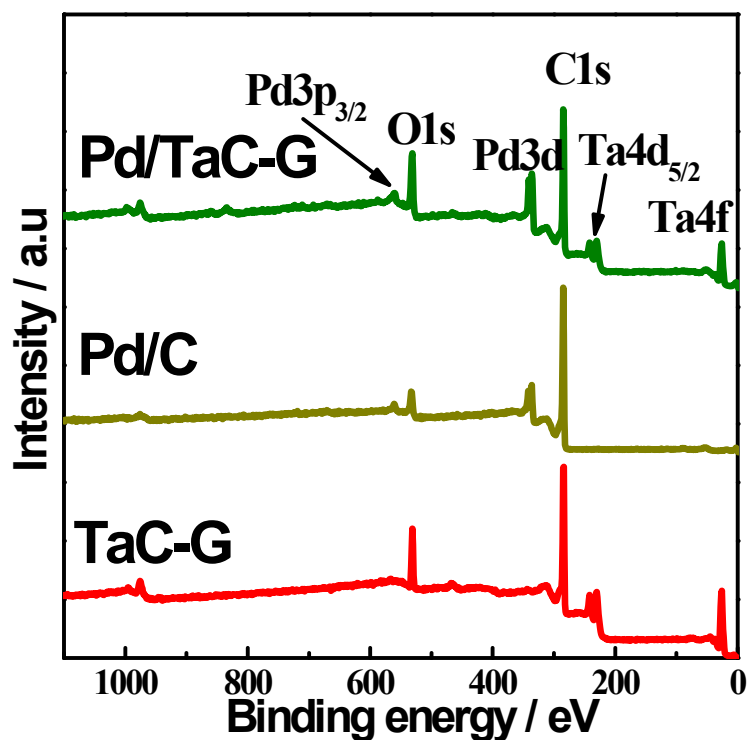

Fig. S12 XPS spectra of the TaC-G, Pd/C and Pd/TaC-G.
